# Supplementary material for: Mitigation Measures for Pandemic Influenza in Italy: An Individual Based Model Considering Different Scenarios
Source: PLOS journal article supplement (doi:10.1371/journal.pone.0001790), 2008-03-12
Supplement: S2 (10.1371/journal.pone.0001790.s002) [file journal.pone.0001790.s002]

Table S1: *Percentage of different household types. \* with additional household member.*

| type                     | percentage |
|--------------------------|------------|
| single without children  | 25.8       |
| single with children     | 7.9        |
| single with children*    | 0.6        |
| couple without children  | 19.7       |
| couple without children* | 1.3        |
| couple with children     | 40         |
| couple with children*    | 1.9        |
| adults living together   | 1.6        |
| more household groups    | 1.2        |
