# Supplementary material for: Mitigation Measures for Pandemic Influenza in Italy: An Individual Based Model Considering Different Scenarios
Source: PLOS journal article supplement (doi:10.1371/journal.pone.0001790), 2008-03-12
Supplement: S4 (10.1371/journal.pone.0001790.s004) [file journal.pone.0001790.s004]

Table S3: *Age class of household heads in couples with children by household size (in percentage).*

| household size | age class |       |       |       |       |       |           |
|----------------|-----------|-------|-------|-------|-------|-------|-----------|
|                | 18-24     | 25-34 | 35-44 | 45-54 | 55-64 | 65-74 | $\geq 75$ |
| 3              | 1.7       | 18.8  | 23.3  | 23.7  | 21.4  | 9.1   | 2         |
| 4              | 0.5       | 14.4  | 43.6  | 28.8  | 10.7  | 1.8   | 0.2       |
| $\geq 5$       | 0.3       | 9.8   | 45.5  | 33.7  | 8.7   | 1.7   | 0.2       |
