# Supplementary material for: Mitigation Measures for Pandemic Influenza in Italy: An Individual Based Model Considering Different Scenarios
Source: PLOS journal article supplement (doi:10.1371/journal.pone.0001790), 2008-03-12
Supplement: S5 (10.1371/journal.pone.0001790.s005) [file journal.pone.0001790.s005]

Table S4: *Age class of household head in couples without children.*

| age class | percentage |
|-----------|------------|
| 15-34     | 8          |
| 35-44     | 17.8       |
| 45-54     | 22.1       |
| $\geq 55$ | 52.1       |
