# Supplementary material for: Mitigation Measures for Pandemic Influenza in Italy: An Individual Based Model Considering Different Scenarios
Source: PLOS journal article supplement (doi:10.1371/journal.pone.0001790), 2008-03-12
Supplement: S6 (10.1371/journal.pone.0001790.s006) [file journal.pone.0001790.s006]

Table S5: *Age class of singles without children.*

| age class | percentage |
|-----------|------------|
| 15–24     | 1.5        |
| 25–44     | 24.2       |
| 45–64     | 21.8       |
| $\geq 65$ | 52.5       |
